# Supplementary material
Source: HighWire-hosted journal article supplement (https://gut.bmj.com/content/68/12/2179)
Supplement: inline-supplementary-material-1 [file inline-supplementary-material-1.pdf]

Supplementary Table 1. Colon + rectum (C18-20) incidence trends, age 20-49 years

|                                          | Years available | Segment 1   |        | Segment 2   |        | Segment 3   |       | Segment 4   |       | Segment 5 |     | Most recent 10 years |        |            | ASR         |            |
|------------------------------------------|-----------------|-------------|--------|-------------|--------|-------------|-------|-------------|-------|-----------|-----|----------------------|--------|------------|-------------|------------|
|                                          |                 | Period      | APC    | Period      | APC    | Period      | APC   | Period      | APC   | Period    | APC | Period               | AAPC   | 95% CI     | 2008-2012   | 95% CI     |
| <b>North America</b>                     |                 |             |        |             |        |             |       |             |       |           |     |                      |        |            |             |            |
| USA, SEER (9 registries)                 | 1975-2016       | 1975 - 1994 | -1.0 * | 1994 - 2016 | 2.2 *  |             |       |             |       |           |     | 2007 - 2016          | 2.2 *  | 1.9, 2.5   | 10.0        | 9.8, 10.3  |
| Canada (excl. Nunavut, Quebec and Yukon) | 1983-2012       | 1983 - 1996 | -1.6 * | 1996 - 2010 | 1.4 *  | 2010 - 2012 | 7.9   |             |       |           |     | 2003 - 2012          | 2.8 *  | 1.1, 4.6   | 9.1         | 8.9, 9.3   |
| <b>Oceania</b>                           |                 |             |        |             |        |             |       |             |       |           |     |                      |        |            |             |            |
| Australia                                | 1982-2015       | 1982 - 1994 | -1.6 * | 1994 - 2005 | 0.4    | 2005 - 2015 | 2.8 * |             |       |           |     | 2006 - 2015          | 2.8 *  | 2.1, 3.6   | 11.2        | 10.9, 11.5 |
| New Zealand                              | 1983-2016       | 1983 - 1992 | -6.3 * | 1992 - 2008 | -0.1   | 2008 - 2016 | 4.5 * |             |       |           |     | 2007 - 2016          | 4.0 *  | 2.1, 6.0   | 9.3         | 8.8, 10.0  |
| <b>Latin America</b>                     |                 |             |        |             |        |             |       |             |       |           |     |                      |        |            |             |            |
| Brazil, Goiania                          | 1993-2012       | 1993 - 2006 | 6.0 *  | 2006 - 2012 | -6.9   |             |       |             |       |           |     | 2003 - 2012          | -2.8   | -7.0, 1.7  | 8.1         | 7.1, 9.1   |
| Costa Rica                               | 1982-2011       | 1982 - 2011 | 1.8 *  |             |        |             |       |             |       |           |     | 2002 - 2011          | 1.8 *  | 1.3, 2.3   | 5.1         | 4.6, 5.6   |
| <b>Europe</b>                            |                 |             |        |             |        |             |       |             |       |           |     |                      |        |            |             |            |
| Austria                                  | 1998-2012       | 1998 - 2012 | -0.9 * |             |        |             |       |             |       |           |     | 2003 - 2012          | -0.9 * | -1.7, -0.2 | 6.2         | 5.8, 6.5   |
| Bulgaria                                 | 1998-2012       | 1998 - 2012 | -0.1   |             |        |             |       |             |       |           |     | 2003 - 2012          | -0.1   | -1.0, 0.8  | 7.5         | 7.1, 8.0   |
| Croatia                                  | 1988-2012       | 1988 - 2000 | 4.6 *  | 2000 - 2012 | -1.2   |             |       |             |       |           |     | 2003 - 2012          | -1.2   | -2.9, 0.7  | 8.6         | 8.0, 9.2   |
| Cyprus                                   | 1998-2012       | 1998 - 2012 | 3.8 *  |             |        |             |       |             |       |           |     | 2003 - 2012          | 3.8 *  | 1.4, 6.2   | 7.8         | 6.5, 9.0   |
| Denmark                                  | 1978-2012       | 1978 - 1994 | -1.6 * | 1994 - 2012 | 1.0 *  |             |       |             |       |           |     | 2003 - 2012          | 1.0 *  | 0.4, 1.7   | 7.4         | 6.9, 7.8   |
| Estonia                                  | 1983-2012       | 1983 - 2012 | 0.1    |             |        |             |       |             |       |           |     | 2003 - 2012          | 0.1    | -0.7, 0.9  | 6.0         | 5.1, 6.9   |
| Finland                                  | 1953-2016       | 1953 - 1969 | 3.0 *  | 1969-2016   | 0.9 *  |             |       |             |       |           |     | 2007 - 2016          | 0.9 *  | 0.7, 1.1   | unavailable |            |
| France (9 registries)                    | 1998-2012       | 1998 - 2012 | -0.4   |             |        |             |       |             |       |           |     | 2003 - 2012          | -0.4   | -1.1, 0.2  | 7.2         | 6.8, 7.6   |
| Germany (2 registries)                   | 1998-2012       | 1998 - 2012 | 1.3 *  |             |        |             |       |             |       |           |     | 2003 - 2012          | 1.3 *  | 0.1, 2.5   | 7.7         | 7.1, 8.4   |
| Ireland                                  | 1994-2012       | 1994 - 2012 | 0.4    |             |        |             |       |             |       |           |     | 2003 - 2012          | 0.4    | -0.5, 1.3  | 8.2         | 7.7, 8.8   |
| Italy (8 registries)                     | 1998-2012       | 1998 - 2012 | -1.0 * |             |        |             |       |             |       |           |     | 2003 - 2012          | -1.0 * | -2.0, -0.1 | 7.9         | 7.4, 8.4   |
| Lithuania                                | 1993-2012       | 1993 - 2012 | -1.1 * |             |        |             |       |             |       |           |     | 2003 - 2012          | -1.1 * | -2.0, -0.3 | 5.4         | 4.9, 6.0   |
| Malta                                    | 1993-2012       | 1993 - 2012 | -1.7   |             |        |             |       |             |       |           |     | 2003 - 2012          | -1.7   | -3.6, 0.3  | 6.4         | 4.7, 8.0   |
| Netherlands                              | 1989-2012       | 1989 - 1998 | -0.7   | 1998 - 2012 | 2.0 *  |             |       |             |       |           |     | 2003 - 2012          | 2.0 *  | 1.6, 2.4   | 9.1         | 8.8, 9.4   |
| Norway                                   | 1953-2017       | 1953 - 1992 | 2.4 *  | 1992 - 1996 | -7.0   | 1996 - 2017 | 1.9 * |             |       |           |     | 2008 - 2017          | 1.9 *  | 1.4, 2.5   | 8.8         | 8.3, 9.4   |
| Poland, Kielce                           | 1998-2012       | 1998 - 2012 | -0.6   |             |        |             |       |             |       |           |     | 2003 - 2012          | -0.6   | -2.6, 1.5  | 6.2         | 5.2, 7.1   |
| Slovakia                                 | 1971-2010       | 1971 - 1977 | 6.3 *  | 1977 - 1981 | -6.2   | 1981 - 1984 | 11.3  | 1984 - 2010 | 0.5 * |           |     | 2001 - 2010          | 0.5 *  | 0.2, 0.9   | 10.0        | 9.3, 10.7  |
| Slovenia                                 | 1983-2012       | 1983 - 2012 | 0.8 *  |             |        |             |       |             |       |           |     | 2003 - 2012          | 0.8 *  | 0.4, 1.3   | 8.4         | 7.6, 9.2   |
| Spain (9 registries)                     | 1993-2012       | 1993 - 2012 | -0.4   |             |        |             |       |             |       |           |     | 2003 - 2012          | -0.4   | -0.9, 0.3  | 7.7         | 7.3, 8.1   |
| Sweden                                   | 1970-2017       | 1970 - 1992 | -1.2 * | 1992 - 2017 | 1.6 *  |             |       |             |       |           |     | 2008 - 2017          | 1.6 *  | 1.3, 2.0   | 7.5         | 7.2, 7.9   |
| Switzerland (6 registries)               | 1998-2012       | 1998 - 2012 | 0.4    |             |        |             |       |             |       |           |     | 2003 - 2012          | 0.4    | -1.6, 2.5  | 7.1         | 6.4, 7.8   |
| United Kingdom                           | 1995-2012       | 1995 - 2010 | 1.1 *  | 2010 - 2012 | 11.3 * |             |       |             |       |           |     | 2003 - 2012          | 3.3 *  | 1.1, 5.5   | 7.3         | 7.2, 7.5   |
| <b>Asia</b>                              |                 |             |        |             |        |             |       |             |       |           |     |                      |        |            |             |            |
| China (5 registries)                     | 1998-2012       | 1998 - 2005 | 0.5    | 2005 - 2010 | -4.3   | 2010 - 2012 | 12.8  |             |       |           |     | 2003 - 2012          | 0.4    | -3.5, 4.4  | 6.4         | 6.1, 6.7   |
| India, Chennai                           | 1983-2012       | 1983 - 2012 | 3.0 *  |             |        |             |       |             |       |           |     | 2003 - 2012          | 3.0 *  | 2.2, 3.8   | 3.5         | 3.2, 3.9   |
| Israel                                   | 1963-2012       | 1963 - 2007 | 0.9 *  | 2007 - 2012 | -3.0   |             |       |             |       |           |     | 2003 - 2012          | -1.3   | -3.6, 1.1  | 7.8         | 7.4, 8.3   |
| Japan (4 registries)                     | 1998-2012       | 1998 - 2012 | 0.0    |             |        |             |       |             |       |           |     | 2003 - 2012          | 0.0    | -0.7, 0.7  | 9.7         | 9.3, 10.1  |
| Korea (5 registries)                     | 1999-2012       | 1999 - 2006 | 6.1 *  | 2006 - 2012 | 3.2 *  |             |       |             |       |           |     | 2003 - 2012          | 4.2 *  | 3.4, 5.0   | 12.9        | 12.6, 13.3 |
| Philippines, Manila                      | 1983-2012       | 1983 - 2008 | 1.7 *  | 2008 - 2012 | -8.5   |             |       |             |       |           |     | 2003 - 2012          | -3.0   | -6.8, 1.1  | 6.5         | 6.1, 7.0   |
| Thailand (4 registries)                  | 1993-2012       | 1993 - 2012 | 2.9 *  |             |        |             |       |             |       |           |     | 2003 - 2012          | 2.9 *  | 2.1, 3.6   | 5.4         | 5.0, 5.8   |
| Turkey (2 registries)                    | 1998-2012       | 1998 - 2012 | 2.4 *  |             |        |             |       |             |       |           |     | 2003 - 2012          | 2.4 *  | 1.4, 3.4   | 6.2         | 5.8, 6.7   |

\*Statistically significant

APC = annual percent change; AAPC = average annual percent change

Sources: Cancer Incidence in Five Continents; Australian Institute for Health and Welfare; New Zealand Ministry of Health; United States SEER 9 registries; Cancer Registry of Norway; Finnish Cancer Registry; Sweden cancer statistics database and population statistics databases

Supplementary Table 2. Colon + rectum (C18-20) incidence trends, age 50+ years

|                                          | Years available | Segment 1   |        | Segment 2   |        | Segment 3   |        | Segment 4   |        | Segment 5   |       | Most recent 10 years |        |            | ASR       |              |
|------------------------------------------|-----------------|-------------|--------|-------------|--------|-------------|--------|-------------|--------|-------------|-------|----------------------|--------|------------|-----------|--------------|
|                                          |                 | Period      | APC    | Period      | APC    | Period      | APC    | Period      | APC    | Period      | APC   | Period               | AAPC   | 95% CI     | 2008-2012 | 95% CI       |
| <b>North America</b>                     |                 |             |        |             |        |             |        |             |        |             |       |                      |        |            |           |              |
| USA, SEER (9 registries)                 | 1975-2016       | 1975 - 1985 | 0.9 *  | 1985 - 1995 | -1.7 * | 1995 - 2000 | 0.3    | 2000 - 2013 | -3.2 * | 2013 - 2016 | -0.6  | 2007 - 2016          | -2.4 * | -3.1, -1.7 | 109.6     | 108.6, 110.6 |
| Canada (excl. Nunavut, Quebec and Yukon) | 1983-2012       | 1983 - 1996 | -0.8 * | 1996 - 2000 | 1.4    | 2000 - 2008 | -0.5   | 2008 - 2012 | -2.0 * |             |       | 2003 - 2012          | -1.2 * | -1.8, -0.6 | 145.7     | 144.6, 146.9 |
| <b>Oceania</b>                           |                 |             |        |             |        |             |        |             |        |             |       |                      |        |            |           |              |
| Australia                                | 1982-2015       | 1982 - 1995 | 1.1 *  | 1995 - 2008 | -0.4   | 2008 - 2015 | -2.7 * |             |        |             |       | 2006 - 2015          | -2.2 * | -2.7, -1.6 | 166.0     | 164.6, 167.3 |
| New Zealand                              | 1983-2016       | 1983 - 1999 | 0.3 *  | 1999 - 2016 | -1.8 * |             |        |             |        |             |       | 2007 - 2016          | -1.8 * | -2.1, -1.6 | 168.5     | 165.5, 171.5 |
| <b>Latin America</b>                     |                 |             |        |             |        |             |        |             |        |             |       |                      |        |            |           |              |
| Brazil, Goiania                          | 1993-2012       | 1993 - 2005 | 6.0 *  | 2005 - 2012 | -1.5   |             |        |             |        |             |       | 2003 - 2012          | 0.1    | -2.6, 3.0  | 94.1      | 88.6, 99.6   |
| Costa Rica                               | 1982-2011       | 1982 - 2011 | 2.7 *  |             |        |             |        |             |        |             |       | 2002 - 2011          | 2.7 *  | 2.3, 3.1   | 56.9      | 54.3, 59.5   |
| <b>Europe</b>                            |                 |             |        |             |        |             |        |             |        |             |       |                      |        |            |           |              |
| Austria                                  | 1998-2012       | 1998 - 2005 | -1.1 * | 2005 - 2012 | -3.4 * |             |        |             |        |             |       | 2003 - 2012          | -2.9 * | -3.5, -2.3 | 114.1     | 112.4, 115.7 |
| Bulgaria                                 | 1998-2012       | 1998 - 2008 | 3.0 *  | 2008 - 2012 | -1.4   |             |        |             |        |             |       | 2003 - 2012          | 1.0 *  | 0.1, 2.0   | 129.6     | 127.7, 131.4 |
| Croatia                                  | 1988-2012       | 1988 - 2000 | 5.2 *  | 2000 - 2012 | 0.3    |             |        |             |        |             |       | 2003 - 2012          | 0.3    | -0.6, 1.1  | 153.6     | 151.0, 156.3 |
| Cyprus                                   | 1998-2012       | 1998 - 2012 | 2.4 *  |             |        |             |        |             |        |             |       | 2003 - 2012          | 2.4 *  | 1.3, 3.5   | 108.5     | 102.9, 114.1 |
| Denmark                                  | 1978-2012       | 1978 - 2002 | 0.2 *  | 2002 - 2006 | 2.6    | 2006 - 2012 | -0.7   |             |        |             |       | 2003 - 2012          | 0.4    | -0.9, 1.7  | 165.8     | 163.4, 168.2 |
| Estonia                                  | 1983-2012       | 1983 - 2012 | 1.5 *  |             |        |             |        |             |        |             |       | 2003 - 2012          | 1.5 *  | 1.3, 1.8   | 124.8     | 120.6, 129.1 |
| Finland                                  | 1953-2016       | 1953 - 1957 | -3.9   | 1957 - 1960 | 11.7   | 1960 - 1977 | 2.1 *  | 1977 - 1997 | 1.1 *  | 1997 - 2016 | 0.6 * | 2007 - 2016          | 0.6 *  | 0.4, 0.8   |           | unavailable  |
| France (9 registries)                    | 1998-2012       | 1998 - 2012 | -0.6 * |             |        |             |        |             |        |             |       | 2003 - 2012          | -0.6 * | -1.1, -0.2 | 127.0     | 125.2, 128.9 |
| Germany (2 registries)                   | 1998-2012       | 1998 - 2012 | -1.0 * |             |        |             |        |             |        |             |       | 2003 - 2012          | -1.0 * | -1.6, -0.3 | 141.0     | 137.9, 144.2 |
| Ireland                                  | 1994-2012       | 1994 - 2012 | 0.1    |             |        |             |        |             |        |             |       | 2003 - 2012          | 0.1    | -0.2, 0.3  | 155.7     | 152.7, 158.7 |
| Italy (8 registries)                     | 1998-2012       | 1998 - 2003 | 0.6    | 2003 - 2006 | 4.9    | 2006 - 2012 | -4.5 * |             |        |             |       | 2003 - 2012          | -1.5 * | -2.9, -0.0 | 148.8     | 146.4, 151.2 |
| Lithuania                                | 1993-2012       | 1993 - 2012 | 1.4 *  |             |        |             |        |             |        |             |       | 2003 - 2012          | 1.4 *  | 1.2, 1.7   | 116.9     | 114.1, 119.7 |
| Malta                                    | 1993-2012       | 1993 - 2012 | 0.7    |             |        |             |        |             |        |             |       | 2003 - 2012          | 0.7    | -0.0, 1.5  | 116.7     | 109.3, 124.1 |
| Netherlands                              | 1989-2012       | 1989 - 2001 | 1.0 *  | 2001 - 2007 | 2.0 *  | 2007 - 2012 | 0.4    |             |        |             |       | 2003 - 2012          | 1.1 *  | 0.7, 1.6   | 174.9     | 173.4, 176.3 |
| Norway                                   | 1953-2017       | 1953 - 1975 | 2.5 *  | 1975 - 1978 | 6.1    | 1978 - 1997 | 1.7 *  | 1997 - 2017 | 0.5 *  |             |       | 2008 - 2017          | 0.5 *  | 0.3, 0.7   | 177.0     | 174.2, 179.8 |
| Poland, Kielce                           | 1998-2012       | 1998 - 2012 | 1.3 *  |             |        |             |        |             |        |             |       | 2003 - 2012          | 1.3 *  | 0.6, 2.0   | 112.3     | 107.9, 116.7 |
| Slovakia                                 | 1971-2010       | 1971 - 1998 | 3.0 *  | 1998 - 2010 | 1.4 *  |             |        |             |        |             |       | 2001 - 2010          | 1.4 *  | 0.8, 2.0   | 192.5     | 188.6, 196.3 |
| Slovenia                                 | 1983-2012       | 1983 - 1998 | 3.2 *  | 1998 - 2007 | 1.0    | 2007 - 2010 | 7.6    | 2010 - 2012 | -9.4 * |             |       | 2003 - 2012          | 0.7    | -2.5, 4.0  | 175.9     | 171.6, 180.1 |
| Spain (9 registries)                     | 1993-2012       | 1993 - 2012 | 2.3 *  |             |        |             |        |             |        |             |       | 2003 - 2012          | 2.3 *  | 2.1, 2.5   | 166.6     | 164.3, 168.9 |
| Sweden                                   | 1970-2017       | 1970 - 1992 | 0.7 *  | 1992 - 1996 | -0.9   | 1996 - 2007 | 0.9 *  | 2007 - 2017 | -0.2   |             |       | 2008 - 2017          | -0.2   | -0.5, 0.1  | 128.2     | 126.6, 129.8 |
| Switzerland (6 registries)               | 1998-2012       | 1998 - 2007 | 0.6    | 2007 - 2012 | -2.5 * |             |        |             |        |             |       | 2003 - 2012          | -1.2 * | -2.2, -0.1 | 116.0     | 112.9, 119.1 |
| United Kingdom                           | 1995-2012       | 1995 - 1998 | 1.7    | 1998 - 2003 | -1.3   | 2003 - 2010 | 1.4 *  | 2010 - 2012 | -1.1   |             |       | 2003 - 2012          | 0.9    | -0.0, 1.8  | 139.7     | 139.0, 140.4 |
| <b>Asia</b>                              |                 |             |        |             |        |             |        |             |        |             |       |                      |        |            |           |              |
| China (5 registries)                     | 1998-2012       | 1998 - 2002 | 3.6 *  | 2002 - 2012 | 0.2    |             |        |             |        |             |       | 2003 - 2012          | 0.2    | -0.1, 0.5  | 107.2     | 105.6, 108.7 |
| India, Chennai                           | 1983-2012       | 1983 - 2002 | 2.2 *  | 2002 - 2012 | 5.5 *  |             |        |             |        |             |       | 2003 - 2012          | 5.5 *  | 3.9, 7.2   | 27.5      | 25.9, 29.1   |
| Israel                                   | 1963-2012       | 1963 - 1979 | 4.5 *  | 1979 - 2000 | 1.2 *  | 2000 - 2007 | -0.5   | 2007 - 2012 | -5.5 * |             |       | 2003 - 2012          | -3.3 * | -4.4, -2.3 | 141.3     | 138.9, 143.7 |
| Japan (4 registries)                     | 1998-2012       | 1998 - 2002 | -0.5   | 2002 - 2012 | 1.6 *  |             |        |             |        |             |       | 2003 - 2012          | 1.6 *  | 1.1, 2.0   | 164.0     | 162.5, 165.5 |
| Korea (5 registries)                     | 1999-2012       | 1999 - 2009 | 5.5 *  | 2009 - 2012 | 0.2    |             |        |             |        |             |       | 2003 - 2012          | 3.7 *  | 2.8, 4.6   | 165.3     | 163.7, 166.9 |
| Philippines, Manila                      | 1983-2012       | 1983 - 2006 | 1.9 *  | 2006 - 2012 | -5.3 * |             |        |             |        |             |       | 2003 - 2012          | -3.0 * | -4.5, -1.4 | 84.0      | 81.0, 86.9   |
| Thailand (4 registries)                  | 1993-2012       | 1993 - 2012 | 3.8 *  |             |        |             |        |             |        |             |       | 2003 - 2012          | 3.8 *  | 3.3, 4.3   | 48.3      | 46.7, 49.9   |
| Turkey (2 registries)                    | 1998-2012       | 1998 - 2003 | 9.2 *  | 2003 - 2012 | 1.9 *  |             |        |             |        |             |       | 2003 - 2012          | 1.9 *  | 0.6, 3.2   | 75.1      | 73.0, 77.3   |

\*Statistically significant

APC = annual percent change; AAPC = average annual percent change

Sources: Cancer Incidence in Five Continents; Australian Institute for Health and Welfare; New Zealand Ministry of Health; United States SEER 9 registries; Cancer Registry of Norway; Finnish Cancer Registry; Sweden cancer statistics database and population statistics database

Supplementary Table 3. Colon cancer (C18) incidence trends, age 20-49 years

|                                          | Years available | Segment 1   |        | Segment 2   |       | Segment 3   |        | Segment 4   |       | Segment 5 |     | Most recent 10 years |        |            | ASR       |          |
|------------------------------------------|-----------------|-------------|--------|-------------|-------|-------------|--------|-------------|-------|-----------|-----|----------------------|--------|------------|-----------|----------|
|                                          |                 | Period      | APC    | Period      | APC   | Period      | APC    | Period      | APC   | Period    | APC | Period               | AAPC   | 95% CI     | 2008-2012 | 95% CI   |
| <b>North America</b>                     |                 |             |        |             |       |             |        |             |       |           |     |                      |        |            |           |          |
| USA, SEER (9 registries)                 | 1975-2016       | 1975 - 1996 | -1.3 * | 1996 - 2016 | 2.1 * |             |        |             |       |           |     | 2007 - 2016          | 2.1 *  | 1.7, 2.6   | 6.0       | 5.8, 6.1 |
| Canada (excl. Nunavut, Quebec and Yukon) | 1983-2012       | 1983 - 1998 | -1.8 * | 1998 - 2012 | 1.4 * |             |        |             |       |           |     | 2003 - 2012          | 1.4 *  | 0.9, 2.0   | 5.3       | 5.1, 5.5 |
| <b>Oceania</b>                           |                 |             |        |             |       |             |        |             |       |           |     |                      |        |            |           |          |
| Australia                                | 1982-2015       | 1982 - 1995 | -2.4 * | 1995 - 2000 | 1.8   | 2000 - 2003 | -4.8   | 2003 - 2015 | 3.4 * |           |     | 2006 - 2015          | 3.4 *  | 2.7, 4.1   | 6.8       | 6.6, 7.1 |
| New Zealand                              | 1983-2016       | 1983 - 1994 | -6.1 * | 1994 - 2010 | -0.2  | 2010 - 2016 | 6.9 *  |             |       |           |     | 2007 - 2016          | 4.5 *  | 1.8, 7.2   | 5.6       | 5.2, 6.1 |
| <b>Latin America</b>                     |                 |             |        |             |       |             |        |             |       |           |     |                      |        |            |           |          |
| Brazil, Goiania <sup>§</sup>             | 1993-2012       | 1993 - 2007 | 5.5 *  | 2007 - 2012 | -9.4  |             |        |             |       |           |     | 2003 - 2012          | -3.1   | -8.3, 2.5  | 5.1       | 4.3, 5.9 |
| Costa Rica                               | 1982-2011       | 1982 - 2011 | 1.9 *  |             |       |             |        |             |       |           |     | 2002 - 2011          | 1.9 *  | 1.1, 2.6   | 2.5       | 2.2, 2.8 |
| <b>Europe</b>                            |                 |             |        |             |       |             |        |             |       |           |     |                      |        |            |           |          |
| Austria                                  | 1998-2012       | 1998 - 2012 | -0.2   |             |       |             |        |             |       |           |     | 2003 - 2012          | -0.2   | -1.5, 1.1  | 3.7       | 3.4, 3.9 |
| Bulgaria                                 | 1998-2012       | 1998 - 2012 | 0.4    |             |       |             |        |             |       |           |     | 2003 - 2012          | 0.4    | -0.8, 1.6  | 4.5       | 4.2, 4.8 |
| Croatia                                  | 1988-2012       | 1988 - 2012 | 1.5 *  |             |       |             |        |             |       |           |     | 2003 - 2012          | 1.5 *  | 0.3, 2.6   | 4.7       | 4.2, 5.1 |
| Cyprus <sup>§</sup>                      | 1998-2012       | 1998 - 2012 | 3.6 *  |             |       |             |        |             |       |           |     | 2003 - 2012          | 3.6 *  | 0.8, 6.6   | 6.3       | 5.1, 7.4 |
| Denmark                                  | 1978-2012       | 1978 - 1998 | -1.3 * | 1998 - 2012 | 1.5 * |             |        |             |       |           |     | 2003 - 2012          | 1.5 *  | 0.1, 3.0   | 4.4       | 4.1, 4.8 |
| Estonia                                  | 1983-2012       | 1983 - 2012 | 0.3    |             |       |             |        |             |       |           |     | 2003 - 2012          | 0.3    | -0.7, 1.4  | 3.8       | 3.1, 4.5 |
| France (9 registries)                    | 1998-2012       | 1998 - 2012 | 0.2    |             |       |             |        |             |       |           |     | 2003 - 2012          | 0.2    | -0.5, 1.0  | 4.4       | 4.1, 4.7 |
| Germany (2 registries)                   | 1998-2012       | 1998 - 2012 | 1.8 *  |             |       |             |        |             |       |           |     | 2003 - 2012          | 1.8 *  | 0.1, 3.6   | 4.8       | 4.3, 5.3 |
| Ireland                                  | 1994-2012       | 1994 - 2012 | -0.1   |             |       |             |        |             |       |           |     | 2003 - 2012          | -0.1   | -1.1, 1.0  | 4.8       | 4.4, 5.3 |
| Italy (8 registries)                     | 1998-2012       | 1998 - 2012 | -1.3 * |             |       |             |        |             |       |           |     | 2003 - 2012          | -1.3 * | -2.5, -0.2 | 5.4       | 5.0, 5.8 |
| Lithuania                                | 1993-2012       | 1993 - 2012 | -1.5 * |             |       |             |        |             |       |           |     | 2003 - 2012          | -1.5 * | -2.5, -0.4 | 2.9       | 2.5, 3.2 |
| Malta <sup>§</sup>                       | 1993-2012       | 1993 - 2012 | -1.3   |             |       |             |        |             |       |           |     | 2003 - 2012          | -1.3   | -4.2, 1.7  | 3.7       | 2.5, 5.0 |
| Netherlands                              | 1989-2012       | 1989 - 1997 | -1.3   | 1997 - 2012 | 1.9 * |             |        |             |       |           |     | 2003 - 2012          | 1.9 *  | 1.4, 2.5   | 5.7       | 5.4, 5.9 |
| Norway                                   | 1953-2012       | 1953 - 1977 | 2.4 *  | 1977 - 2012 | 0.5 * |             |        |             |       |           |     | 2003 - 2012          | 0.5 *  | 0.2, 0.9   | 5.5       | 5.1, 5.9 |
| Poland, Kielce                           | 1998-2012       | 1998 - 2012 | 0.5    |             |       |             |        |             |       |           |     | 2003 - 2012          | 0.5    | -1.8, 2.7  | 3.4       | 2.7, 4.1 |
| Slovakia                                 | 1971-2010       | 1971 - 2010 | 1.4 *  |             |       |             |        |             |       |           |     | 2001 - 2010          | 1.4 *  | 1.0, 1.8   | 3.2       | 2.9, 3.5 |
| Slovenia                                 | 1983-2012       | 1983 - 2012 | 1.4 *  |             |       |             |        |             |       |           |     | 2003 - 2012          | 1.4 *  | 0.5, 2.2   | 4.3       | 3.7, 4.8 |
| Spain (9 registries)                     | 1993-2012       | 1993 - 2012 | -0.4   |             |       |             |        |             |       |           |     | 2003 - 2012          | -0.4   | -1.1, 0.2  | 4.7       | 4.4, 5.1 |
| Sweden                                   | 1970-2017       | 1970 - 1993 | -1.3 * | 1993 - 2017 | 1.7 * |             |        |             |       |           |     | 2008 - 2017          | 1.7 *  | 1.3, 2.1   | 4.9       | 4.6, 5.2 |
| Switzerland (6 registries)               | 1998-2012       | 1998 - 2012 | 1.6    |             |       |             |        |             |       |           |     | 2003 - 2012          | 1.6    | -1.3, 4.5  | 4.7       | 4.1, 5.2 |
| United Kingdom                           | 1995-2012       | 1995 - 2002 | -0.9   | 2002 - 2010 | 2.3 * | 2010 - 2012 | 11.9 * |             |       |           |     | 2003 - 2012          | 4.3 *  | 1.9, 6.8   | 4.4       | 4.3, 4.5 |
| <b>Asia</b>                              |                 |             |        |             |       |             |        |             |       |           |     |                      |        |            |           |          |
| China (5 registries)                     | 1998-2012       | 1998 - 2012 | -0.4   |             |       |             |        |             |       |           |     | 2003 - 2012          | -0.4   | -1.5, 0.7  | 3.5       | 3.2, 3.7 |
| India, Chennai <sup>§</sup>              | 1983-2012       | 1983 - 2012 | 3.0 *  |             |       |             |        |             |       |           |     | 2003 - 2012          | 3.0 *  | 1.9, 4.1   | 1.6       | 1.4, 1.9 |
| Israel                                   | 1963-2012       | 1963 - 1990 | 1.4 *  | 1990 - 1993 | 8.8   | 1993 - 2012 | -0.4   |             |       |           |     | 2003 - 2012          | -0.4   | -1.1, 0.3  | 4.8       | 4.4, 5.1 |
| Japan (4 registries)                     | 1998-2012       | 1998 - 2012 | -0.5   |             |       |             |        |             |       |           |     | 2003 - 2012          | -0.5   | -1.3, 0.3  | 5.2       | 5.0, 5.5 |
| Korea (5 registries)                     | 1999-2012       | 1999 - 2006 | 7.2 *  | 2006 - 2012 | 1.7   |             |        |             |       |           |     | 2003 - 2012          | 3.5 *  | 2.2, 4.8   | 6.2       | 6.0, 6.4 |
| Philippines, Manila                      | 1983-2012       | 1983 - 2012 | 1.3 *  |             |       |             |        |             |       |           |     | 2003 - 2012          | 1.3 *  | 0.6, 2.1   | 4.0       | 3.7, 4.4 |
| Thailand (4 registries)                  | 1993-2012       | 1993 - 2012 | 1.8 *  |             |       |             |        |             |       |           |     | 2003 - 2012          | 1.8 *  | 0.8, 2.8   | 3.0       | 2.7, 3.3 |
| Turkey (2 registries)                    | 1998-2012       | 1998 - 2012 | 2.0 *  |             |       |             |        |             |       |           |     | 2003 - 2012          | 2.0 *  | 0.3, 3.8   | 3.5       | 3.2, 3.8 |

\*Statistically significant

§Based on &lt;10 cases in one or more years

APC = annual percent change; AAPC = average annual percent change

Sources: Cancer Incidence in Five Continents; Australian Institute for Health and Welfare; New Zealand Ministry of Health; United States SEER 9 registries; Cancer Registry of Norway; Sweden cancer statistics database and population statistics database

Supplementary Table 4. Rectum and rectosigmoid junction cancer (C19-20) incidence trends, age 20-49 years

|                                          | Years available | Segment 1   |      | Segment 2   |             | Segment 3   |     | Segment 4   |     | Segment 5 |             | Most recent 10 years |             |             | ASR       |          |            |          |          |
|------------------------------------------|-----------------|-------------|------|-------------|-------------|-------------|-----|-------------|-----|-----------|-------------|----------------------|-------------|-------------|-----------|----------|------------|----------|----------|
|                                          |                 | Period      | APC  | Period      | APC         | Period      | APC | Period      | APC | Period    | APC         | Period               | AAPC        | 95% CI      | 2008-2012 | 95% CI   |            |          |          |
| <b>North America</b>                     |                 |             |      |             |             |             |     |             |     |           |             |                      |             |             |           |          |            |          |          |
| USA, SEER (9 registries)                 | 1975-2016       | 1975 - 1994 | -0.3 | 1994 - 1997 | 7.6         | 1997 - 2016 | 2.1 | *           |     |           |             |                      |             | 2007 - 2016 | 2.1       | *        | 1.7, 2.5   | 4.1      | 3.9, 4.2 |
| Canada (excl. Nunavut, Quebec and Yukon) | 1983-2012       | 1983 - 1996 | -0.8 | 1996 - 2012 | 2.8         | *           |     |             |     |           |             |                      |             | 2003 - 2012 | 2.8       | *        | 2.3, 3.3   | 3.8      | 3.7, 4.0 |
| <b>Oceania</b>                           |                 |             |      |             |             |             |     |             |     |           |             |                      |             |             |           |          |            |          |          |
| Australia                                | 1982-2015       | 1982 - 1992 | -1.0 | 1992 - 2015 | 1.6         | *           |     |             |     |           |             |                      |             | 2006 - 2015 | 1.6       | *        | 1.3, 2.0   | 4.7      | 4.5, 4.9 |
| New Zealand                              | 1983-2016       | 1983 - 1992 | -5.7 | *           | 1992 - 2016 | 1.7         | *   |             |     |           |             |                      |             | 2007 - 2016 | 1.7       | *        | 0.9, 2.6   | 3.7      | 3.3, 4.1 |
| <b>Latin America</b>                     |                 |             |      |             |             |             |     |             |     |           |             |                      |             |             |           |          |            |          |          |
| Brazil, Goiania <sup>§</sup>             | 1993-2012       | 1993 - 2012 | 1.8  |             |             |             |     |             |     |           |             |                      |             | 2003 - 2012 | 1.8       |          | -1.2, 4.9  | 3.0      | 2.4, 3.6 |
| Costa Rica <sup>§</sup>                  | 1982-2011       | 1982 - 2011 | 1.6  | *           |             |             |     |             |     |           |             |                      |             | 2002 - 2011 | 1.6       | *        | 0.6, 2.5   | 1.6      | 1.4, 1.9 |
| <b>Europe</b>                            |                 |             |      |             |             |             |     |             |     |           |             |                      |             |             |           |          |            |          |          |
| Austria                                  | 1998-2012       | 1998 - 2012 | -1.8 | *           |             |             |     |             |     |           |             |                      |             | 2003 - 2012 | -1.8      | *        | -3.0, -0.7 | 2.5      | 2.3, 2.7 |
| Bulgaria                                 | 1998-2012       | 1998 - 2012 | -0.9 | *           |             |             |     |             |     |           |             |                      |             | 2003 - 2012 | -0.9      | *        | -1.6, -0.1 | 3.1      | 2.8, 3.3 |
| Croatia                                  | 1988-2012       | 1988 - 2000 | 5.6  | *           | 2000 - 2012 | -1.7        |     |             |     |           |             |                      |             | 2003 - 2012 | -1.7      |          | -3.5, 0.1  | 3.9      | 3.6, 4.3 |
| Cyprus**                                 | 1998-2012       |             |      |             |             |             |     |             |     |           |             |                      |             |             |           |          |            | 1.5      | 1.0, 2.1 |
| Denmark                                  | 1978-2012       | 1978 - 1994 | -1.5 | *           | 1994 - 2012 | 1.1         | *   |             |     |           |             |                      |             | 2003 - 2012 | 1.1       | *        | 0.1, 2.2   | 2.9      | 2.6, 3.2 |
| Estonia <sup>§</sup>                     | 1983-2012       | 1983 - 2012 | -0.1 |             |             |             |     |             |     |           |             |                      |             | 2003 - 2012 | -0.1      |          | -1.4, 1.3  | 2.2      | 1.6, 2.7 |
| France (9 registries)                    | 1998-2012       | 1998 - 2001 | -8.5 |             | 2001 - 2012 | 0.0         |     |             |     |           |             |                      |             | 2003 - 2012 | 0.0       |          | -1.8, 1.7  | 2.7      | 2.5, 3.0 |
| Germany (2 registries)                   | 1998-2012       | 1998 - 2012 | 0.4  |             |             |             |     |             |     |           |             |                      |             | 2003 - 2012 | 0.4       |          | -2.0, 2.9  | 2.9      | 2.6, 3.3 |
| Ireland                                  | 1994-2012       | 1994 - 2012 | 1.1  |             |             |             |     |             |     |           |             |                      |             | 2003 - 2012 | 1.1       |          | -0.2, 2.3  | 3.4      | 3.0, 3.7 |
| Italy (8 registries)                     | 1998-2012       | 1998 - 2012 | -0.3 |             |             |             |     |             |     |           |             |                      |             | 2003 - 2012 | -0.3      |          | -2.1, 1.6  | 2.5      | 2.2, 2.8 |
| Lithuania                                | 1993-2012       | 1993 - 2012 | -0.6 |             |             |             |     |             |     |           |             |                      |             | 2003 - 2012 | -0.6      |          | -2.1, 0.8  | 2.6      | 2.2, 2.9 |
| Malta <sup>§</sup>                       | 1993-2012       | 1993 - 2010 | -4.9 | *           | 2010 - 2012 | 71.1        |     |             |     |           |             |                      |             | 2003 - 2012 | 8.4       |          | -8.2, 27.9 | 2.6      | 1.6, 3.7 |
| Netherlands                              | 1989-2012       | 1989 - 1998 | -0.2 |             | 1998 - 2012 | 1.9         | *   |             |     |           |             |                      |             | 2003 - 2012 | 1.9       | *        | 1.4, 2.5   | 3.4      | 3.3, 3.6 |
| Norway                                   | 1953-2012       | 1953 - 1979 | 3.5  | *           | 1979 - 2012 | 0.5         |     |             |     |           |             |                      |             | 2003 - 2012 | 0.5       |          | -0.0, 1.0  | 3.3      | 3.0, 3.7 |
| Poland, Kielce                           | 1998-2012       | 1998 - 2012 | -1.8 |             |             |             |     |             |     |           |             |                      |             | 2003 - 2012 | -1.8      |          | -5.1, 1.7  | 2.8      | 2.2, 3.4 |
| Slovakia                                 | 1971-2010       | 1971 - 1977 | 8.7  | *           | 1977 - 1981 | -8.9        |     | 1981 - 1987 | 8.3 | *         | 1987 - 1990 | -7.4                 | 1990 - 2010 | 0.9         | *         | 0.2, 1.6 | 2.8        | 2.5, 3.1 |          |
| Slovenia                                 | 1983-2012       | 1983 - 2001 | -1.6 | *           | 2001 - 2012 | 3.5         | *   |             |     |           |             |                      |             | 2003 - 2012 | 3.5       | *        | 1.1, 6.0   | 4.2      | 3.6, 4.7 |
| Spain (9 registries)                     | 1993-2012       | 1993 - 2012 | -0.2 |             |             |             |     |             |     |           |             |                      |             | 2003 - 2012 | -0.2      |          | -1.1, 0.7  | 3.0      | 2.7, 3.2 |
| Sweden                                   | 1970-2017       | 1970 - 1992 | -0.5 |             | 1992 - 2017 | 1.6         | *   |             |     |           |             |                      |             | 2008 - 2017 | 1.6       | *        | 1.0, 2.2   | 2.6      | 2.4, 2.8 |
| Switzerland (6 registries)               | 1998-2012       | 1998 - 2012 | -1.5 |             |             |             |     |             |     |           |             |                      |             | 2003 - 2012 | -1.5      |          | -4.1, 1.1  | 2.4      | 2.0, 2.8 |
| United Kingdom                           | 1995-2012       | 1995 - 2012 | 1.7  | *           |             |             |     |             |     |           |             |                      |             | 2003 - 2012 | 1.7       | *        | 1.2, 2.2   | 2.9      | 2.8, 3.0 |
| <b>Asia</b>                              |                 |             |      |             |             |             |     |             |     |           |             |                      |             |             |           |          |            |          |          |
| China (5 registries)                     | 1998-2012       | 1998 - 2012 | -1.1 |             |             |             |     |             |     |           |             |                      |             | 2003 - 2012 | -1.1      |          | -2.3, 0.2  | 2.9      | 2.7, 3.2 |
| India, Chennai <sup>§</sup>              | 1983-2012       | 1983 - 2012 | 2.7  | *           |             |             |     |             |     |           |             |                      |             | 2003 - 2012 | 2.7       | *        | 1.7, 3.7   | 1.9      | 1.6, 2.1 |
| Israel                                   | 1963-2012       | 1963 - 2012 | 0.0  |             |             |             |     |             |     |           |             |                      |             | 2003 - 2012 | 0.0       |          | -0.4, 0.3  | 3.1      | 2.8, 3.3 |
| Japan (4 registries)                     | 1998-2012       | 1998 - 2012 | 0.7  |             |             |             |     |             |     |           |             |                      |             | 2003 - 2012 | 0.7       |          | -0.2, 1.6  | 4.5      | 4.2, 4.7 |
| Korea (5 registries)                     | 1999-2012       | 1999 - 2012 | 4.9  | *           |             |             |     |             |     |           |             |                      |             | 2003 - 2012 | 4.9       | *        | 4.3, 5.4   | 6.7      | 6.5, 6.9 |
| Philippines, Manila                      | 1983-2012       | 1983 - 2008 | 1.3  | *           | 2008 - 2012 | -12.4       | *   |             |     |           |             |                      |             | 2003 - 2012 | -5.0      |          | -10.0, 0.3 | 2.5      | 2.2, 2.8 |
| Thailand (4 registries)                  | 1993-2012       | 1993 - 2001 | 9.3  | *           | 2001 - 2004 | -6.3        |     | 2004 - 2012 | 7.0 | *         |             |                      |             | 2003 - 2012 | 5.4       | *        | 1.5, 9.5   | 2.4      | 2.1, 2.6 |
| Turkey (2 registries)                    | 1998-2012       | 1998 - 2012 | 2.8  | *           |             |             |     |             |     |           |             |                      |             | 2003 - 2012 | 2.8       | *        | 1.2, 4.5   | 2.7      | 2.5, 3.0 |

\*Statistically significant

\*\*No joinpoint analysis because one or more years had zero cases

§Based on &lt;10 cases in one or more years

APC = annual percent change; AAPC = average annual percent change

Sources: Cancer Incidence in Five Continents; Australian Institute for Health and Welfare; New Zealand Ministry of Health; United States SEER 9 registries; Cancer Registry of Norway; Sweden cancer statistics database and population statistics database

Supplementary Table 5. Colon cancer (C18) incidence trends, age 50+ years

|                                          | Years available | Segment 1   |        | Segment 2   |        | Segment 3   |        | Segment 4   |        | Segment 5   |        | Most recent 10 years |        |            | ASR       |              |
|------------------------------------------|-----------------|-------------|--------|-------------|--------|-------------|--------|-------------|--------|-------------|--------|----------------------|--------|------------|-----------|--------------|
|                                          |                 | Period      | APC    | Period      | APC    | Period      | APC    | Period      | APC    | Period      | APC    | Period               | AAPC   | 95% CI     | 2008-2012 | 95% CI       |
| <b>North America</b>                     |                 |             |        |             |        |             |        |             |        |             |        |                      |        |            |           |              |
| USA, SEER (9 registries)                 | 1975-2016       | 1975 - 1985 | 1.2 *  | 1985 - 1995 | -1.6 * | 1995 - 2001 | -0.2   | 2001 - 2013 | -3.6 * | 2013 - 2016 | -1.3   | 2007 - 2016          | -2.8 * | -3.6, -2.0 | 77.0      | 76.2, 77.8   |
| Canada (excl. Nunavut, Quebec and Yukon) | 1983-2012       | 1983 - 1985 | 2.0    | 1985 - 1996 | -1.1 * | 1996 - 1999 | 1.5    | 1999 - 2008 | -0.6 * | 2008 - 2012 | -2.4 * | 2003 - 2012          | -1.4 * | -1.9, -0.9 | 95.7      | 94.8, 96.6   |
| <b>Oceania</b>                           |                 |             |        |             |        |             |        |             |        |             |        |                      |        |            |           |              |
| Australia                                | 1982-2015       | 1982 - 1994 | 1.0 *  | 1994 - 2008 | -0.3   | 2008 - 2015 | -2.5 * |             |        |             |        | 2006 - 2015          | -2.0 * | -2.6, -1.4 | 108.8     | 107.7, 109.8 |
| New Zealand                              | 1983-2016       | 1983 - 1996 | 0.8 *  | 1996 - 2016 | -1.8 * |             |        |             |        |             |        | 2007 - 2016          | -1.8 * | -2.0, -1.5 | 111.8     | 109.4, 114.2 |
| <b>Latin America</b>                     |                 |             |        |             |        |             |        |             |        |             |        |                      |        |            |           |              |
| Brazil, Goiania                          | 1993-2012       | 1993 - 2012 | 2.5 *  |             |        |             |        |             |        |             |        | 2003 - 2012          | 2.5 *  | 1.0, 4.0   | 56.2      | 51.9, 60.5   |
| Costa Rica                               | 1982-2011       | 1982 - 2004 | 4.3 *  | 2004 - 2011 | 0.6    |             |        |             |        |             |        | 2002 - 2011          | 1.4    | -0.7, 3.6  | 34.1      | 32.3, 35.8   |
| <b>Europe</b>                            |                 |             |        |             |        |             |        |             |        |             |        |                      |        |            |           |              |
| Austria                                  | 1998-2012       | 1998 - 2005 | -1.1 * | 2005 - 2012 | -3.0 * |             |        |             |        |             |        | 2003 - 2012          | -2.6 * | -3.3, -1.8 | 72.9      | 71.5, 74.2   |
| Bulgaria                                 | 1998-2012       | 1998 - 2008 | 3.9 *  | 2008 - 2012 | -1.5   |             |        |             |        |             |        | 2003 - 2012          | 1.5 *  | 0.5, 2.5   | 76.0      | 74.6, 77.4   |
| Croatia                                  | 1988-2012       | 1988 - 2012 | 3.2 *  |             |        |             |        |             |        |             |        | 2003 - 2012          | 3.2 *  | 2.6, 3.8   | 89.4      | 87.4, 91.4   |
| Cyprus                                   | 1998-2012       | 1998 - 2012 | 3.0 *  |             |        |             |        |             |        |             |        | 2003 - 2012          | 3.0 *  | 1.5, 4.5   | 77.7      | 73.0, 82.4   |
| Denmark                                  | 1978-2012       | 1978 - 1996 | 0.3 *  | 1996 - 2012 | 1.2 *  |             |        |             |        |             |        | 2003 - 2012          | 1.2 *  | 0.8, 1.5   | 106.3     | 104.4, 108.2 |
| Estonia                                  | 1983-2012       | 1983 - 1996 | 3.6 *  | 1996 - 2012 | 0.8 *  |             |        |             |        |             |        | 2003 - 2012          | 0.8 *  | 0.2, 1.4   | 74.9      | 71.7, 78.2   |
| France (9 registries)                    | 1998-2012       | 1998 - 2012 | -0.3   |             |        |             |        |             |        |             |        | 2003 - 2012          | -0.3   | -0.8, 0.3  | 82.2      | 80.7, 83.7   |
| Germany (2 registries)                   | 1998-2012       | 1998 - 2012 | -0.8 * |             |        |             |        |             |        |             |        | 2003 - 2012          | -0.8 * | -1.4, -0.2 | 91.5      | 89.0, 94.0   |
| Ireland                                  | 1994-2012       | 1994 - 2012 | 0.2    |             |        |             |        |             |        |             |        | 2003 - 2012          | 0.2    | -0.2, 0.6  | 100.0     | 97.6, 102.4  |
| Italy (8 registries)                     | 1998-2012       | 1998 - 2003 | 0.1    | 2003 - 2006 | 6.5    | 2006 - 2012 | -4.7 * |             |        |             |        | 2003 - 2012          | -1.1   | -3.4, 1.2  | 107.7     | 105.6, 109.7 |
| Lithuania                                | 1993-2012       | 1993 - 2012 | 2.0 *  |             |        |             |        |             |        |             |        | 2003 - 2012          | 2.0 *  | 1.6, 2.5   | 63.8      | 61.8, 65.9   |
| Malta                                    | 1993-2012       | 1993 - 2012 | 1.0    |             |        |             |        |             |        |             |        | 2003 - 2012          | 1.0    | -0.0, 2.1  | 78.0      | 71.9, 84.1   |
| Netherlands                              | 1989-2012       | 1989 - 1992 | 2.2 *  | 1992 - 2002 | 0.8 *  | 2002 - 2008 | 2.6 *  | 2008 - 2012 | 0.9 *  |             |        | 2003 - 2012          | 1.8 *  | 1.4, 2.3   | 116.3     | 115.1, 117.5 |
| Norway                                   | 1953-2012       | 1953 - 1967 | 3.1 *  | 1967 - 1973 | -0.2   | 1973 - 1977 | 6.4 *  | 1977 - 1995 | 2.1 *  | 1995 - 2012 | 0.8 *  | 2003 - 2012          | 0.8 *  | 0.7, 1.0   | 116.5     | 114.2, 118.7 |
| Poland, Kielce                           | 1998-2012       | 1998 - 2012 | 1.8 *  |             |        |             |        |             |        |             |        | 2003 - 2012          | 1.8 *  | 1.0, 2.6   | 64.2      | 60.9, 67.6   |
| Slovakia                                 | 1971-2010       | 1971 - 1989 | 4.7 *  | 1989 - 2010 | 2.5 *  |             |        |             |        |             |        | 2001 - 2010          | 2.5 *  | 2.1, 2.8   | 66.7      | 64.9, 68.4   |
| Slovenia                                 | 1983-2012       | 1983 - 1998 | 4.6 *  | 1998 - 2007 | 1.4 *  | 2007 - 2010 | 9.3    | 2010 - 2012 | -7.9   |             |        | 2003 - 2012          | 1.8    | -2.2, 5.9  | 102.1     | 98.9, 105.3  |
| Spain (9 registries)                     | 1993-2012       | 1993 - 2010 | 2.6 *  | 2010 - 2012 | 8.4 *  |             |        |             |        |             |        | 2003 - 2012          | 3.9 *  | 2.7, 5.0   | 112.1     | 110.3, 114   |
| Sweden                                   | 1970-2017       | 1970 - 2004 | 0.5 *  | 2004 - 2007 | 2.4 *  | 2007 - 2017 | -0.2   |             |        |             |        | 2008 - 2017          | -0.2   | -0.6, 0.2  | 84.1      | 82.8, 85.4   |
| Switzerland (6 registries)               | 1998-2012       | 1998 - 2012 | -0.2   |             |        |             |        |             |        |             |        | 2003 - 2012          | -0.2   | -0.9, 0.6  | 75.2      | 72.7, 77.6   |
| United Kingdom                           | 1995-2012       | 1995 - 2005 | -0.7 * | 2005 - 2008 | 3.7    | 2008 - 2012 | 0.1    |             |        |             |        | 2003 - 2012          | 1.1    | -0.4, 2.7  | 88.5      | 87.9, 89.0   |
| <b>Asia</b>                              |                 |             |        |             |        |             |        |             |        |             |        |                      |        |            |           |              |
| China (5 registries)                     | 1998-2012       | 1998 - 2001 | 4.8    | 2001 - 2012 | 0.4    |             |        |             |        |             |        | 2003 - 2012          | 0.4    | -0.2, 1.0  | 65.1      | 64.0, 66.3   |
| India, Chennai                           | 1983-2012       | 1983 - 2002 | 2.0 *  | 2002 - 2012 | 8.8 *  |             |        |             |        |             |        | 2003 - 2012          | 8.8 *  | 6.4, 11.3  | 14.2      | 13.1, 15.3   |
| Israel                                   | 1963-2012       | 1963 - 1995 | 3.6 *  | 1995 - 2007 | -0.1   | 2007 - 2012 | -5.7 * |             |        |             |        | 2003 - 2012          | -3.3 * | -4.2, -2.3 | 99.8      | 97.8, 101.8  |
| Japan (4 registries)                     | 1998-2012       | 1998 - 2012 | 0.9 *  |             |        |             |        |             |        |             |        | 2003 - 2012          | 0.9 *  | 0.5, 1.2   | 102.2     | 101.1, 103.4 |
| Korea (5 registries)                     | 1999-2012       | 1999 - 2008 | 7.4 *  | 2008 - 2012 | 1.6    |             |        |             |        |             |        | 2003 - 2012          | 4.7 *  | 3.8, 5.7   | 96.9      | 95.7, 98.1   |
| Philippines, Manila                      | 1983-2012       | 1983 - 2006 | 2.4 *  | 2006 - 2012 | -4.3 * |             |        |             |        |             |        | 2003 - 2012          | -2.1 * | -3.9, -0.3 | 56.4      | 54.0, 58.9   |
| Thailand (4 registries)                  | 1993-2012       | 1993 - 2012 | 3.3 *  |             |        |             |        |             |        |             |        | 2003 - 2012          | 3.3 *  | 2.6, 4.1   | 27.3      | 26.1, 28.5   |
| Turkey (2 registries)                    | 1998-2012       | 1998 - 2004 | 9.3 *  | 2004 - 2012 | 1.4    |             |        |             |        |             |        | 2003 - 2012          | 2.2 *  | 0.8, 3.7   | 45.0      | 43.4, 46.7   |

\*Statistically significant

§Based on &lt;10 cases in one or more years

APC = annual percent change; AAPC = average annual percent change

Sources: Cancer Incidence in Five Continents; Australian Institute for Health and Welfare; New Zealand Ministry of Health; United States SEER 9 registries; Cancer Registry of Norway; Sweden cancer statistics database and population statistics database

Supplementary Table 6. Rectum and rectosigmoid junction cancer (C19-20) incidence trends, age 50+ years

|                                          | Years available | Segment 1   |        | Segment 2   |        | Segment 3   |        | Segment 4   |        | Segment 5   |     | Most recent 10 years |        |            | ASR       |            |
|------------------------------------------|-----------------|-------------|--------|-------------|--------|-------------|--------|-------------|--------|-------------|-----|----------------------|--------|------------|-----------|------------|
|                                          |                 | Period      | APC    | Period      | APC    | Period      | APC    | Period      | APC    | Period      | APC | Period               | AAPC   | 95% CI     | 2008-2012 | 95% CI     |
| <b>North America</b>                     |                 |             |        |             |        |             |        |             |        |             |     |                      |        |            |           |            |
| USA, SEER (9 registries)                 | 1975-2016       | 1975 - 1985 | 0.1    | 1985 - 1995 | -2.2 * | 1995 - 1998 | 2.2    | 1998 - 2012 | -2.7 * | 2012 - 2016 | 0.2 | 2007 - 2016          | -1.4 * | -2.3, -0.5 | 32.6      | 32.0, 33.1 |
| Canada (excl. Nunavut, Quebec and Yukon) | 1983-2012       | 1983 - 1997 | -0.5 * | 1997 - 2000 | 3.7    | 2000 - 2012 | -0.6 * |             |        |             |     | 2003 - 2012          | -0.6 * | -1.0, -0.3 | 50.0      | 49.4, 50.7 |
| <b>Oceania</b>                           |                 |             |        |             |        |             |        |             |        |             |     |                      |        |            |           |            |
| Australia                                | 1982-2015       | 1982 - 1986 | -0.8   | 1986 - 1994 | 2.2 *  | 1994 - 2007 | -0.2   | 2007 - 2015 | -3.0 * |             |     | 2006 - 2015          | -2.7 * | -3.2, -2.1 | 57.5      | 56.7, 58.3 |
| New Zealand                              | 1983-2016       | 1983 - 1999 | 0.3    | 1999 - 2016 | -1.6 * |             |        |             |        |             |     | 2007 - 2016          | -1.6 * | -1.9, -1.2 | 56.7      | 54.9, 58.4 |
| <b>Latin America</b>                     |                 |             |        |             |        |             |        |             |        |             |     |                      |        |            |           |            |
| Brazil, Goiania                          | 1993-2012       | 1993 - 2012 | 3.3 *  |             |        |             |        |             |        |             |     | 2003 - 2012          | 3.3 *  | 1.5, 5.2   | 37.9      | 34.4, 41.4 |
| Costa Rica                               | 1982-2011       | 1982 - 2011 | 1.5 *  |             |        |             |        |             |        |             |     | 2002 - 2011          | 1.5 *  | 0.8, 2.1   | 14.9      | 13.7, 16.1 |
| <b>Europe</b>                            |                 |             |        |             |        |             |        |             |        |             |     |                      |        |            |           |            |
| Austria                                  | 1998-2012       | 1998 - 2006 | -1.4 * | 2006 - 2012 | -4.5 * |             |        |             |        |             |     | 2003 - 2012          | -3.5 * | -4.6, -2.3 | 41.2      | 40.2, 42.2 |
| Bulgaria                                 | 1998-2012       | 1998 - 2003 | -0.6   | 2003 - 2006 | 6.2    | 2006 - 2012 | -1.2 * |             |        |             |     | 2003 - 2012          | 1.2    | -0.6, 3.1  | 53.6      | 52.4, 54.8 |
| Croatia                                  | 1988-2012       | 1988 - 2000 | 5.2 *  | 2000 - 2012 | -1.4 * |             |        |             |        |             |     | 2003 - 2012          | -1.4 * | -2.4, -0.4 | 64.2      | 62.5, 65.9 |
| Cyprus                                   | 1998-2012       | 1998 - 2012 | 1.3    |             |        |             |        |             |        |             |     | 2003 - 2012          | 1.3    | -0.7, 3.3  | 30.8      | 27.8, 33.8 |
| Denmark                                  | 1978-2012       | 1978 - 2012 | -0.1   |             |        |             |        |             |        |             |     | 2003 - 2012          | -0.1   | -0.2, 0.1  | 59.5      | 58.0, 61.0 |
| Estonia                                  | 1983-2012       | 1983 - 2012 | 1.1 *  |             |        |             |        |             |        |             |     | 2003 - 2012          | 1.1 *  | 0.7, 1.5   | 49.9      | 47.2, 52.6 |
| France (9 registries)                    | 1998-2012       | 1998 - 2012 | -1.3 * |             |        |             |        |             |        |             |     | 2003 - 2012          | -1.3 * | -1.8, -0.8 | 44.8      | 43.7, 46.0 |
| Germany (2 registries)                   | 1998-2012       | 1998 - 2009 | -0.3   | 2009 - 2012 | -7.7 * |             |        |             |        |             |     | 2003 - 2012          | -2.8 * | -5.0, -0.5 | 49.5      | 47.6, 51.4 |
| Ireland                                  | 1994-2012       | 1994 - 2012 | -0.1   |             |        |             |        |             |        |             |     | 2003 - 2012          | -0.1   | -0.5, 0.2  | 55.7      | 53.8, 57.5 |
| Italy (8 registries)                     | 1998-2012       | 1998 - 2006 | 1.6 *  | 2006 - 2012 | -4.1 * |             |        |             |        |             |     | 2003 - 2012          | -2.3 * | -3.4, -1.1 | 41.1      | 39.9, 42.4 |
| Lithuania                                | 1993-2012       | 1993 - 2012 | 0.7 *  |             |        |             |        |             |        |             |     | 2003 - 2012          | 0.7 *  | 0.5, 1.0   | 53.1      | 51.2, 55.0 |
| Malta                                    | 1993-2012       | 1993 - 2009 | 1.4    | 2009 - 2012 | -13.4  |             |        |             |        |             |     | 2003 - 2012          | -3.8   | -9.0, 1.7  | 38.7      | 34.4, 43.0 |
| Netherlands                              | 1989-2012       | 1989 - 2007 | 1.3 *  | 2007 - 2012 | -1.2   |             |        |             |        |             |     | 2003 - 2012          | -0.1   | -0.8, 0.7  | 58.6      | 57.7, 59.4 |
| Norway                                   | 1953-2012       | 1953 - 1966 | 1.5 *  | 1966 - 1969 | 10.3   | 1969 - 1982 | 3.4 *  | 1982 - 2012 | 0.4 *  |             |     | 2003 - 2012          | 0.4 *  | 0.3, 0.6   | 60.6      | 58.9, 62.3 |
| Poland, Kielce                           | 1998-2012       | 1998 - 2012 | 0.6    |             |        |             |        |             |        |             |     | 2003 - 2012          | 0.6    | -0.7, 1.9  | 48.1      | 45.2, 50.9 |
| Slovakia                                 | 1971-2010       | 1971 - 1998 | 2.1 *  | 1998 - 2010 | 1.0 *  |             |        |             |        |             |     | 2001 - 2010          | 1.0 *  | 0.3, 1.6   | 48.8      | 47.3, 50.3 |
| Slovenia                                 | 1983-2012       | 1983 - 2010 | 1.5 *  | 2010 - 2012 | -8.4   |             |        |             |        |             |     | 2003 - 2012          | -0.8   | -3.6, 2.1  | 73.7      | 71.0, 76.5 |
| Spain (9 registries)                     | 1993-2012       | 1993 - 2012 | 1.4 *  |             |        |             |        |             |        |             |     | 2003 - 2012          | 1.4 *  | 1.0, 1.8   | 54.5      | 53.2, 55.8 |
| Sweden                                   | 1970-2017       | 1970 - 1984 | 1.1 *  | 1984 - 2006 | 0.2 *  | 2006 - 2017 | -0.4   |             |        |             |     | 2008 - 2017          | -0.4   | -0.4, 0.1  | 44.1      | 43.1, 45.1 |
| Switzerland (6 registries)               | 1998-2012       | 1998 - 2012 | -0.8 * |             |        |             |        |             |        |             |     | 2003 - 2012          | -0.8 * | -1.5, -0.1 | 40.8      | 39.0, 42.7 |
| United Kingdom                           | 1995-2012       | 1995 - 1998 | 4.3 *  | 1998 - 2001 | -2.0   | 2001 - 2012 | 0.3    |             |        |             |     | 2003 - 2012          | 0.3    | -0.0, 0.6  | 51.2      | 50.8, 51.7 |
| <b>Asia</b>                              |                 |             |        |             |        |             |        |             |        |             |     |                      |        |            |           |            |
| China (5 registries)                     | 1998-2012       | 1998 - 2002 | 3.6 *  | 2002 - 2012 | 0.0    |             |        |             |        |             |     | 2003 - 2012          | 0.0    | -0.7, 0.7  | 42.0      | 41.0, 43.0 |
| India, Chennai                           | 1983-2012       | 1983 - 2012 | 2.4 *  |             |        |             |        |             |        |             |     | 2003 - 2012          | 2.4 *  | 1.9, 3.0   | 13.3      | 12.2, 14.4 |
| Israel                                   | 1963-2012       | 1963 - 1981 | 4.8 *  | 1981 - 1994 | -3.1 * | 1994 - 2007 | 0.6    | 2007 - 2012 | -6.3 * |             |     | 2003 - 2012          | -3.3 * | -5.1, -1.6 | 41.5      | 40.2, 42.8 |
| Japan (4 registries)                     | 1998-2012       | 1998 - 2003 | -0.1   | 2003 - 2012 | 2.4 *  |             |        |             |        |             |     | 2003 - 2012          | 2.4 *  | 1.8, 3.0   | 61.7      | 60.8, 62.7 |
| Korea (5 registries)                     | 1999-2012       | 1999 - 2012 | 3.0 *  |             |        |             |        |             |        |             |     | 2003 - 2012          | 3.0 *  | 2.3, 3.6   | 68.4      | 67.4, 69.4 |
| Philippines, Manila                      | 1983-2012       | 1983 - 2006 | 1.0 *  | 2006 - 2012 | -7.3 * |             |        |             |        |             |     | 2003 - 2012          | -4.6 * | -6.8, -2.3 | 27.5      | 25.9, 29.2 |
| Thailand (4 registries)                  | 1993-2012       | 1993 - 2012 | 4.4 *  |             |        |             |        |             |        |             |     | 2003 - 2012          | 4.4 *  | 3.6, 5.2   | 21.0      | 20.0, 22.1 |
| Turkey (2 registries)                    | 1998-2012       | 1998 - 2000 | 19.3   | 2000 - 2012 | 2.4 *  |             |        |             |        |             |     | 2003 - 2012          | 2.4 *  | 1.5, 3.3   | 30.1      | 28.8, 31.4 |

\*Statistically significant

APC = annual percent change; AAPC = average annual percent change

Sources: Cancer Incidence in Five Continents; Australian Institute for Health and Welfare; New Zealand Ministry of Health; United States SEER 9 registries; Cancer Registry of Norway; Sweden cancer statistics database and population statistics database

Supplementary Table 7. Comparison of Colon (C18), rectum (C19-20), and colorectal (C18-20) incidence trends by age (20-49 and 50+ years) with and without the inclusion of appendix (C18.1)

|                                              | Years available | Segment 1   |        | Segment 2   |        | Segment 3   |        | Segment 4   |        | Segment 5   |        | Most recent 10 years |        |            | ASR       |              |
|----------------------------------------------|-----------------|-------------|--------|-------------|--------|-------------|--------|-------------|--------|-------------|--------|----------------------|--------|------------|-----------|--------------|
|                                              |                 | Period      | APC    | Period      | APC    | Period      | APC    | Period      | APC    | Period      | APC    | Period               | AAPC   | 95% CI     | 2008-2012 | 95% CI       |
| <b>North America</b>                         |                 |             |        |             |        |             |        |             |        |             |        |                      |        |            |           |              |
| <b>USA, SEER (9 registries), 20-49 years</b> |                 |             |        |             |        |             |        |             |        |             |        |                      |        |            |           |              |
| Colon and rectum (including appendix)        | 1975-2016       | 1975 - 1994 | -1.0 * | 1994 - 2016 | 2.2 *  |             |        |             |        |             |        | 2007 - 2016          | 2.2 *  | 1.9, 2.5   | 10.0      | 9.8, 10.3    |
| Colon and rectum (excluding appendix)        | 1975-2016       | 1975 - 1993 | -1.0 * | 1993 - 2016 | 1.7 *  |             |        |             |        |             |        | 2007 - 2016          | 1.7 *  | 1.5, 2.0   | 9.5       | 9.2, 9.7     |
| Colon (including appendix)                   | 1975-2016       | 1975 - 1996 | -1.3 * | 1996 - 2016 | 2.1 *  |             |        |             |        |             |        | 2007 - 2016          | 2.1 *  | 1.7, 2.6   | 6.0       | 5.8, 6.1     |
| Colon (excluding appendix)                   | 1975-2016       | 1975 - 1995 | -1.3 * | 1995 - 2016 | 1.3 *  |             |        |             |        |             |        | 2007 - 2016          | 1.3 *  | 1.0, 1.7   | 5.4       | 5.2, 5.6     |
| Rectum                                       | 1975-2016       | 1975 - 1994 | -0.3   | 1994 - 1997 | 7.6    | 1997 - 2016 | 2.1 *  |             |        |             |        | 2007 - 2016          | 2.1 *  | 1.7, 2.5   | 4.1       | 3.9, 4.2     |
| <b>USA, SEER (9 registries), 50+ years</b>   |                 |             |        |             |        |             |        |             |        |             |        |                      |        |            |           |              |
| Colon and rectum (including appendix)        | 1975-2016       | 1975 - 1985 | 0.9 *  | 1985 - 1995 | -1.7 * | 1995 - 2000 | 0.3    | 2000 - 2013 | -3.2 * | 2013 - 2016 | -0.6   | 2007 - 2016          | -2.4 * | -3.1, -1.7 | 109.6     | 108.6, 110.6 |
| Colon and rectum (excluding appendix)        | 1975-2016       | 1975 - 1985 | 0.9 *  | 1985 - 1995 | -1.8 * | 1995 - 2000 | 0.3    | 2000 - 2013 | -3.4 * | 2013 - 2016 | -0.9   | 2007 - 2016          | -2.6 * | -3.3, -1.9 | 107.4     | 106.5, 108.4 |
| Colon (including appendix)                   | 1975-2016       | 1975 - 1985 | 1.2 *  | 1985 - 1995 | -1.6 * | 1995 - 2001 | -0.2   | 2001 - 2013 | -3.6 * | 2013 - 2016 | -1.3   | 2007 - 2016          | -2.8 * | -3.6, -2.0 | 77.0      | 76.2, 77.8   |
| Colon (excluding appendix)                   | 1975-2016       | 1975 - 1985 | 1.0 *  | 1985 - 2002 | -1.3 * | 2002 - 2008 | -3.1 * | 2008 - 2011 | -6.0 * | 2011 - 2016 | -1.9 * | 2007 - 2016          | -3.4 * | -5.0, -1.9 | 74.9      | 74.1, 75.7   |
| Rectum                                       | 1975-2016       | 1975 - 1985 | 0.1    | 1985 - 1995 | -2.2 * | 1995 - 1998 | 2.2    | 1998 - 2012 | -2.7 * | 2012 - 2016 | 0.2    | 2007 - 2016          | -1.4 * | -2.3, -0.5 | 32.6      | 32.0, 33.1   |
| <b>Canada (6 registries), 20-49 years</b>    |                 |             |        |             |        |             |        |             |        |             |        |                      |        |            |           |              |
| Colon and rectum (including appendix)        | 1995-2014       | 1995 - 2008 | 1.2 *  | 2008 - 2014 | 5.0 *  |             |        |             |        |             |        | 2005 - 2014          | 3.7 *  | 2.8, 4.6   | 9.3       | 9.1, 9.6     |
| Colon and rectum (excluding appendix)        | 1995-2014       | 1995 - 2006 | 0.8 *  | 2006 - 2014 | 2.9 *  |             |        |             |        |             |        | 2005 - 2014          | 2.6 *  | 1.9, 3.4   | 8.6       | 8.4, 8.9     |
| Colon (including appendix)                   | 1995-2014       | 1995 - 2010 | 0.9 *  | 2010 - 2014 | 7.5 *  |             |        |             |        |             |        | 2005 - 2014          | 3.8 *  | 2.3, 5.3   | 5.4       | 5.2, 5.6     |
| Colon (excluding appendix)                   | 1995-2014       | 1995 - 2014 | 0.8 *  |             |        |             |        |             |        |             |        | 2005 - 2014          | 0.8 *  | 0.5, 1.2   | 4.7       | 4.5, 4.9     |
| Rectum                                       | 1995-2014       | 1995 - 2014 | 2.7 *  |             |        |             |        |             |        |             |        | 2005 - 2014          | 2.7 *  | 2.2, 3.3   | 3.9       | 3.8, 4.1     |
| <b>Canada (6 registries), 50+ years</b>      |                 |             |        |             |        |             |        |             |        |             |        |                      |        |            |           |              |
| Colon and rectum (including appendix)        | 1995-2014       | 1995 - 2000 | 1.2 *  | 2000 - 2014 | -0.7 * |             |        |             |        |             |        | 2005 - 2014          | -0.7 * | -0.8, -0.5 | 149.6     | 148.5, 150.8 |
| Colon and rectum (excluding appendix)        | 1995-2014       | 1995 - 2000 | 1.2 *  | 2000 - 2014 | -0.7 * |             |        |             |        |             |        | 2005 - 2014          | -0.7 * | -0.9, -0.6 | 147.8     | 146.6, 148.9 |
| Colon (including appendix)                   | 1995-2014       | 1995 - 2014 | -0.4 * |             |        |             |        |             |        |             |        | 2005 - 2014          | -0.4 * | -0.5, -0.2 | 98.2      | 97.3, 99.1   |
| Colon (excluding appendix)                   | 1995-2014       | 1995 - 2000 | 0.6    | 2000 - 2014 | -0.7 * |             |        |             |        |             |        | 2005 - 2014          | -0.7 * | -0.9, -0.5 | 96.3      | 95.4, 97.2   |
| Rectum                                       | 1995-2014       | 1995 - 2001 | 1.8 *  | 2001 - 2014 | -0.9 * |             |        |             |        |             |        | 2005 - 2014          | -0.9 * | -1.1, -0.7 | 51.5      | 50.8, 52.2   |
| <b>Oceania</b>                               |                 |             |        |             |        |             |        |             |        |             |        |                      |        |            |           |              |
| <b>New Zealand, 20-49 years</b>              |                 |             |        |             |        |             |        |             |        |             |        |                      |        |            |           |              |
| Colon and rectum (including appendix)        | 1983-2016       | 1983 - 1992 | -6.3 * | 1992 - 2008 | -0.1   | 2008 - 2016 | 4.5 *  |             |        |             |        | 2007 - 2016          | 4.0 *  | 2.1, 6.0   | 9.3       | 8.8, 10.0    |
| Colon and rectum (excluding appendix)        | 1994-2016       | 1994 - 2000 | -0.4 * | 2000 - 2016 | 1.7 *  |             |        |             |        |             |        | 2007 - 2016          | 1.7 *  | 1.0, 2.4   | 8.9       | 8.3, 9.4     |
| Colon (including appendix)                   | 1983-2016       | 1983 - 1994 | -6.1 * | 1994 - 2010 | -0.2   | 2010 - 2016 | 6.9 *  |             |        |             |        | 2007 - 2016          | 4.5 *  | 1.8, 7.2   | 5.6       | 5.2, 6.1     |
| Colon (excluding appendix)                   | 1988-2016       | 1988 - 2000 | -3.9 * | 2000 - 2016 | 1.1 *  |             |        |             |        |             |        | 2007 - 2016          | 1.1 *  | 0.1, 2.0   | 5.2       | 4.7, 5.6     |
| Rectum                                       | 1983-2016       | 1983 - 1992 | -5.7 * | 1992 - 2016 | 1.7 *  |             |        |             |        |             |        | 2007 - 2016          | 1.7 *  | 0.9, 2.6   | 3.7       | 3.3, 4.1     |
| <b>New Zealand, 50+ years</b>                |                 |             |        |             |        |             |        |             |        |             |        |                      |        |            |           |              |
| Colon and rectum (including appendix)        | 1983-2016       | 1983 - 1999 | 0.3 *  | 1999 - 2016 | -1.8 * |             |        |             |        |             |        | 2007 - 2016          | -1.8 * | -2.1, -1.6 | 168.5     | 165.5, 171.5 |
| Colon and rectum (excluding appendix)        | 1994-2016       | 1994 - 2016 | -1.8 * |             |        |             |        |             |        |             |        | 2007 - 2016          | -1.8 * | -1.9, -1.6 | 165.5     | 162.5, 168.5 |
| Colon (including appendix)                   | 1983-2016       | 1983 - 1996 | 0.8 *  | 1996 - 2016 | -1.8 * |             |        |             |        |             |        | 2007 - 2016          | -1.8 * | -2.0, -1.5 | 111.8     | 109.4, 114.2 |
| Colon (excluding appendix)                   | 1988-2016       | 1988 - 1995 | 1.2    | 1995 - 2016 | -1.9 * |             |        |             |        |             |        | 2007 - 2016          | -1.9 * | -2.1, -1.6 | 109.1     | 106.7, 111.5 |
| Rectum                                       | 1983-2016       | 1983 - 1999 | 0.3    | 1999 - 2016 | -1.6 * |             |        |             |        |             |        | 2007 - 2016          | -1.6 * | -1.9, -1.2 | 56.7      | 54.9, 58.4   |

\*Statistically significant

APC = annual percent change; AAPC = average annual percent change

Sources: New Zealand Ministry of Health; United States SEER 9 registries

Notes: 1983-2012 from CI5; 2013-2016 provided by NZ Ministry of Health

Colon excluding appendix 1988-2016 and rectum 1994-2016 provided by NZ Ministry of Health

1983-2012 from CI5; 2013-2016 provided by NZ Ministry of Health

Colon excluding appendix 1988-2016 provided by NZ Ministry of Health

1983-2012 from CI5; 2013-2016 provided by NZ Ministry of Health
